# Supplementary material
Source: ML conference proceedings conference paper supplement (https://proceedings.neurips.cc/paper_files/paper/2015/hash/37f0e884fbad9667e38940169d0a3c95-Abstract.html)
Supplement: Supplementary file [file 37f0e884fbad9667e38940169d0a3c95-Supplemental.zip]

# Supplementary Material of “Empirical Localization of Homogeneous Divergences on Discrete Sample Spaces”

## 1 Proof of Theorem 1

The Hessian matrix of  $S_{\alpha, \alpha', \gamma}(p, q_\theta)$  is

$$\frac{\partial^2}{\partial \theta \partial \theta^T} S_{\alpha, \alpha', \gamma}(p, q_\theta) = \frac{(1 - \alpha)^2}{1 + \gamma} V_{r_{\alpha, \theta}}[\phi] + \frac{\gamma(1 - \alpha')^2}{1 + \gamma} V_{r_{\alpha', \theta}}[\phi] - (1 - \beta)^2 V_{r_{\beta, \theta}}[\phi].$$

For a given  $\beta \neq 1$ , we prove that there exists a model  $q_\theta$  and parameters  $\alpha, \alpha', \gamma$  such that the Hessian is not non-negative definite.

Suppose  $\mathcal{X} = \{+1, -1\}^d$ . For  $\mathbf{x} = (x_1, \dots, x_d) \in \mathcal{X}$ , the function  $\phi(\mathbf{x}) = (\phi_1(\mathbf{x}), \dots, \phi_d(\mathbf{x})) \in \mathbb{R}^d$  is defined by  $\phi_k(\mathbf{x}) = x_k$ ,  $k = 1, \dots, d$ . Then the normalized model is  $\bar{q}_\theta(\mathbf{x}) = \exp\{\sum_{k=1}^d \theta_k x_k - \sum_{k=1}^d \log(e^{\theta_k} + e^{-\theta_k})\}$ . Let  $p$  be the uniform distribution on  $\mathcal{X}$ . The covariance matrix of  $\phi$  is the diagonal matrix given by

$$V_{r_{\alpha, \theta}}[\phi] = 4 \cdot \text{diag} \left( \frac{1}{(e^{(1-\alpha)\theta_1} + e^{-(1-\alpha)\theta_1})^2}, \dots, \frac{1}{(e^{(1-\alpha)\theta_d} + e^{-(1-\alpha)\theta_d})^2} \right).$$

Let  $\delta$  be  $\delta = 1/(1 + \gamma)$ , then  $\delta \in (0, 1)$  holds for  $\gamma > 0$ . We define

$$f(z; \theta) = \frac{(1 - z)^2}{(e^{(1-z)\theta} + e^{-(1-z)\theta})^2}, \quad z, \theta \in \mathbb{R}.$$

Then, the  $i$ -th diagonal elements of the Hessian matrix is expressed by

$$\Delta = \delta \cdot f(\alpha; \theta_i) + (1 - \delta) \cdot f(\alpha'; \theta_i) - f(\delta\alpha + (1 - \delta)\alpha'; \theta_i)$$

up to a positive constant. Our task is to find the parameter  $\alpha, \alpha', \delta$  such that  $\beta = \delta\alpha + (1 - \delta)\alpha'$  and  $\Delta < 0$  hold. The function  $f$  satisfies the following properties.

- (a)  $f(z; \theta) \geq 0$  and  $f(z; \theta) = 0 \Leftrightarrow z = 1$ .
- (b)  $f(1 + \varepsilon; \theta) = f(1 - \varepsilon; \theta) = f(1 + \varepsilon; -\theta)$  for  $\varepsilon \geq 0, \theta \in \mathbb{R}$ .
- (c)  $\lim_{z \rightarrow \pm\infty} f(z; \theta) = 0$  holds for  $\theta \neq 0$ .

Let  $\theta$  be a fixed non-zero real number. Since  $\beta \neq 1$ ,  $f(\beta; \theta) > 0$  holds. Due to the properties (b) and (c), any sufficiently large  $\varepsilon > 0$  satisfies  $f(1 - \varepsilon; \theta) = f(1 + \varepsilon; \theta) < f(\beta; \theta)$ . Define  $\alpha = 1 + \varepsilon$  and  $\alpha' = 1 - \varepsilon$ . By choosing  $\delta \in (0, 1)$  such that  $\beta = \delta\alpha + (1 - \delta)\alpha'$ , we have  $\Delta < 0$ .

**Remark 1.** Even when  $\alpha$  and  $\alpha'$  are both restricted to positive numbers, we need  $\beta = 1$  to ensure the non-negative definiteness of the Hessian matrix. Let us prove this fact. Suppose that  $\beta > 1$ . Due to (a), (c) in the above and the continuity of  $f(z, \theta)$  at  $z = 1$ , there exists  $\alpha$  and  $\alpha'$  satisfying  $1 < \alpha' < \beta < \alpha$  such that both  $f(\alpha'; \theta)$  and  $f(\alpha; \theta)$  are less than  $f(\beta; \theta)$ , where  $\theta$  is a non-zero constant. Then,  $\Delta < 0$  holds for  $\delta \in (0, 1)$  such that  $\beta = \delta\alpha + (1 - \delta)\alpha'$ . We prove the case of  $0 < \beta < 1$ . For a sufficiently large  $\theta$ , we have

$$\frac{f(0; \theta)}{f(\beta; \theta)} = O \left( \frac{e^{-2\beta\theta}}{(1 - \beta)^2} \right) \rightarrow 0 \quad (\theta \rightarrow \infty).$$

Hence, the continuity of  $f$  ensures that there exist a sufficiently large  $\theta$  and a small positive  $\alpha'$  such that  $0 < \alpha' < \beta$  and  $f(\alpha'; \theta) < f(\beta; \theta)$  hold. The property (c) ensures that there exists a sufficiently large  $\alpha > 1$  satisfying  $f(\alpha; \theta) < f(\beta; \theta)$ . Again,  $\Delta < 0$  holds for  $\delta$  such that  $\beta = \delta\alpha + (1 - \delta)\alpha'$ .

## 2 Proof of Theorem 2

Let us assume that the empirical distribution is written as

$$\tilde{p}(\mathbf{x}) = \bar{q}_{\theta_0}(\mathbf{x}) + \epsilon(\mathbf{x}).$$

Note that  $\langle \epsilon \rangle = 0$  because  $\tilde{p}, \bar{q}_{\theta_0} \in \mathcal{P}$ . By expanding an equilibrium condition of the estimator (6) around  $\theta = \theta_0$  and  $\epsilon(\mathbf{x}) = 0$ , we obtain

$$\begin{aligned}
0 &= \frac{\partial}{\partial \theta} S_{\alpha, \alpha', \gamma}(\tilde{p}, q_{\theta}) \Big|_{\theta = \hat{\theta}} \\
&= \frac{\partial}{\partial \theta} S_{\alpha, \alpha', \gamma}(\tilde{p}, q_{\theta}) \Big|_{\theta = \theta_0} + \frac{\partial^2}{\partial \theta \partial \theta^T} S_{\alpha, \alpha', \gamma}(\tilde{p}, q_{\theta}) \Big|_{\theta = \theta_0} (\hat{\theta} - \theta_0) + \mathcal{O}(\|\hat{\theta} - \theta_0\|^2) \\
&= \left\{ \frac{1-\alpha}{1+\gamma} \langle \tilde{r}_{\alpha, \theta_0} \psi'_{\theta_0} \rangle + \frac{\gamma(1-\alpha')}{1+\gamma} \langle \tilde{r}_{\alpha', \theta_0} \psi'_{\theta_0} \rangle - (1-\beta) \langle \tilde{r}_{\beta, \theta_0} \psi'_{\theta_0} \rangle \right\} \\
&\quad + \left\{ \frac{(1-\alpha)^2}{1+\gamma} V_{\tilde{r}_{\alpha, \theta_0}}[\psi'_{\theta_0}] + \frac{\gamma(1-\alpha')^2}{1+\gamma} V_{\tilde{r}_{\alpha', \theta_0}}[\psi'_{\theta_0}] - (1-\beta)^2 V_{\tilde{r}_{\beta, \theta_0}}[\psi'_{\theta_0}] \right. \\
&\quad \left. + \frac{1-\alpha}{1+\gamma} \langle \tilde{r}_{\alpha, \theta_0} \psi''_{\theta_0} \rangle + \frac{\gamma(1-\alpha')}{1+\gamma} \langle \tilde{r}_{\alpha', \theta_0} \psi''_{\theta_0} \rangle - (1-\beta) \langle \tilde{r}_{\beta, \theta_0} \psi''_{\theta_0} \rangle \right\} (\hat{\theta} - \theta_0) + \mathcal{O}(\|\hat{\theta} - \theta_0\|^2).
\end{aligned}$$

By the delta method [1], we observe that

$$\begin{aligned}
(\langle \tilde{r}_{\alpha, \theta_0} \psi'_{\theta_0} \rangle - \langle r_{\alpha, \theta_0} \psi'_{\theta_0} \rangle) &\simeq \alpha \frac{\langle \bar{q}_{\theta_0}^{\alpha-1} q_{\theta_0}^{1-\alpha} \psi'_{\theta_0} \epsilon \rangle \langle \bar{q}_{\theta_0}^{\alpha} q_{\theta_0}^{1-\alpha} \rangle - \langle \bar{q}_{\theta_0}^{\alpha} q_{\theta_0}^{1-\alpha} \psi'_{\theta_0} \rangle \langle \bar{q}_{\theta_0}^{\alpha-1} q_{\theta_0}^{1-\alpha} \epsilon \rangle}{\langle \bar{q}_{\theta_0}^{\alpha} q_{\theta_0}^{1-\alpha} \rangle^2} \\
&= \alpha (\langle \psi'_{\theta_0} \epsilon \rangle - \langle \bar{q}_{\theta_0} \psi'_{\theta_0} \rangle \langle \epsilon \rangle) \\
&= \alpha \langle \psi'_{\theta_0} \epsilon \rangle.
\end{aligned}$$

The last equality comes from  $\langle \epsilon \rangle = \sum_{\mathbf{x} \in \mathcal{X}} \epsilon(\mathbf{x}) = 0$ . Then we have

$$\begin{aligned}
&\frac{\partial}{\partial \theta} S_{\alpha, \alpha', \gamma}(\tilde{p}, q_{\theta}) \Big|_{\theta = \theta_0} - \frac{\partial}{\partial \theta} S_{\alpha, \alpha', \gamma}(p, q_{\theta}) \Big|_{\theta = \theta_0} \\
&= \frac{1-\alpha}{1+\gamma} (\langle \tilde{r}_{\alpha, \theta_0} \psi'_{\theta_0} \rangle - \langle r_{\alpha, \theta_0} \psi'_{\theta_0} \rangle) + \frac{\gamma(1-\alpha')}{1+\gamma} (\langle \tilde{r}_{\alpha', \theta_0} \psi'_{\theta_0} \rangle - \langle r_{\alpha', \theta_0} \psi'_{\theta_0} \rangle) - (1-\beta) (\langle \tilde{r}_{\beta, \theta_0} \psi'_{\theta_0} \rangle - \langle r_{\beta, \theta_0} \psi'_{\theta_0} \rangle) \\
&= \left\{ \frac{1-\alpha}{1+\gamma} \langle \tilde{r}_{\alpha, \theta_0} \psi'_{\theta_0} \rangle + \frac{\gamma(1-\alpha')}{1+\gamma} \langle \tilde{r}_{\alpha', \theta_0} \psi'_{\theta_0} \rangle - (1-\beta) \langle \tilde{r}_{\beta, \theta_0} \psi'_{\theta_0} \rangle \right\} - \left\{ 1 - \frac{\alpha + \gamma\alpha'}{1+\gamma} - (1-\beta) \right\} \langle \bar{q}_{\theta_0} \psi'_{\theta_0} \rangle \\
&\simeq \left( \alpha \frac{1-\alpha}{1+\gamma} + \alpha' \frac{\gamma(1-\alpha')}{1+\gamma} - (1-\beta)\beta \right) \langle \psi'_{\theta_0} \epsilon \rangle \\
&= -\frac{\gamma}{(1+\gamma)^2} (\alpha - \alpha')^2 \langle \psi'_{\theta_0} \epsilon \rangle.
\end{aligned}$$

From the central limit theorem,

$$\sqrt{n} \langle \psi'_{\theta_0} \epsilon \rangle = \sqrt{n} \frac{1}{n} \sum_{i=1}^n (\psi'_{\theta_0}(\mathbf{x}_i) - \langle \bar{q}_{\theta_0} \psi'_{\theta_0} \rangle)$$

asymptotically follows the normal distribution with mean  $\mathbf{0}$ , and variance  $V_{\bar{q}_{\theta_0}}[\psi'_{\theta_0}]$ , which is known as the Fisher information matrix. Also from the law of large number, we have

$$\begin{aligned}
&\frac{(1-\alpha)^2}{1+\gamma} V_{\tilde{r}_{\alpha}}[\psi'_{\theta_0}] + \frac{\gamma(1-\alpha')^2}{1+\gamma} V_{\tilde{r}_{\alpha'}}[\psi'_{\theta_0}] - (1-\beta)^2 V_{\tilde{r}_{\beta}}[\psi'_{\theta_0}] \rightarrow \frac{\gamma}{(1+\gamma)^2} (\alpha - \alpha')^2 V_{\bar{q}_{\theta_0}}[\psi'_{\theta_0}], \\
&\frac{1-\alpha}{1+\gamma} \langle \tilde{r}_{\alpha, \theta_0} \psi''_{\theta_0} \rangle + \frac{\gamma(1-\alpha')}{1+\gamma} \langle \tilde{r}_{\alpha', \theta_0} \psi''_{\theta_0} \rangle - (1-\beta) \langle \tilde{r}_{\beta, \theta_0} \psi''_{\theta_0} \rangle \rightarrow \left( 1 - \frac{\alpha + \gamma\alpha'}{1+\gamma} - (1-\beta) \right) \langle \bar{q}_{\theta_0} \psi''_{\theta_0} \rangle = 0
\end{aligned}$$

in the limit of  $n \rightarrow \infty$ . Consequently, we observe that

$$\sqrt{n}(\hat{\theta} - \theta_0) \sim \mathcal{N}(\mathbf{0}, V_{\bar{q}_{\theta_0}}[\psi'_{\theta_0}]^{-1}).$$

## References

[1] A. W. Van der Vaart. *Asymptotic Statistics*. Cambridge University Press, 1998.
